# Supplementary material for: Shuttling through reversible covalent chemistry
Source: Royal Society of Chemistry journal article supplement (doi:10.1039/b412570c), 2004-01-01
Supplement: b412570c.pdf [file b412570c.pdf]

## Electronic Supporting Information

### Shuttling through reversible covalent chemistry

David A. Leigh\* and Emilio M Pérez

School of Chemistry, University of Edinburgh, The King's Buildings, West Mains Road,  
Edinburgh EH9 3JJ, UK Fax: +44 0131 6679085; Tel: +44 131 650 4721; E-mail:  
David.Laigh@ed.ac.uk

Experimental procedure for the DA reaction: a solution of 0.025 g of *E-1* (0.019 mmol) in 0.5 mL of *d*<sub>6</sub>-DMSO in a NMR tube was treated with ~10 eq. of freshly cracked and distilled cyclopentadiene. The solution was degassed with N<sub>2</sub> and the NMR tube sealed. This solution was heated at 80 °C for 16 hrs and then allowed to cool to room temperature, extracted with CHCl<sub>3</sub> and washed with water. The organic phase was dried over MgSO<sub>4</sub>, the solvent evaporated under reduced pressure and the residue purified by column chromatography (silica, CHCl<sub>3</sub>/MeOH 98:2) to yield *Cp-1* as a colourless solid (90%). A similar procedure (8 h reaction time) was used to prepare *Cp-2* (93%) from *E-2*. Experimental procedure for the r-DA reaction: 0.010 g of *Cp-1* (0.007 mmol) in a glass vial were placed in the inlet oven of an FVP apparatus, then heated to 250°C under reduced pressure (10<sup>-2</sup> Torr) for 20 minutes, to quantitatively yield *E-1*.

Physical data for *Cp-1*: Mp 180-182 °C; <sup>1</sup>H NMR (CDCl<sub>3</sub>, 400 MHz, 298 K) δ 8.30 (s, 2H, H<sub>C</sub> or C'), 8.27 (s, 2H, H<sub>C</sub> or C'), 8.19 (m, 8H, H<sub>B</sub> and B'), 7.60 (t, J = 7.8 Hz, 4H, H<sub>A</sub> and A'), 7.46 (bt, 4H, H<sub>D</sub> or D'), 7.39 (bt, 4H, H<sub>D</sub> or D'), 7.35-7.10 (m, 40 H, H<sub>Ph</sub>), 7.03 (s, 8H, H<sub>F</sub> or F'), 7.01 (s, 8H, H<sub>F</sub> or F'), 6.38 (bt, 1H, H<sub>k</sub> or k'), 6.31 (m, 3H, H<sub>k</sub> or k', H<sub>e</sub> and e'), 6.15 (m, 2H, H<sub>5</sub> and H<sub>4'</sub>), 6.05 (m, 2H, H<sub>h</sub> or h' and H<sub>5'</sub>), 5.85 (bt, 1H, H<sub>h</sub> or h'), 5.59 (m, 1H, H<sub>4</sub>), 4.64-4.35 (m, 20H, H<sub>E</sub> and E' and H<sub>b</sub> and b'), 4.19 (m, 4H, H<sub>a</sub> and a' and H<sub>m</sub> and m'), 3.96-3.67 (m, 4H, H<sub>l</sub> and l'), 3.01-2.92 (m, 10H, H<sub>f</sub> and f', H<sub>g</sub> and g', H<sub>3'</sub> and H<sub>6'</sub>), 2.81 (s, 1H, H<sub>6</sub>), 2.76 (s, 1H, H<sub>3</sub>), 2.63 (m, 1H, H<sub>2</sub>), 2.56 (dd, J = 3.8 Hz, J = 1.8 Hz, 1H, H<sub>2'</sub>), 2.20 (d, J = 5.1 Hz, 1H, H<sub>1'</sub>), 2.06 (d, J = 5.5 Hz, 1H, H<sub>1</sub>), 1.61-1.08 (m, 52H, H<sub>alkyl</sub>, H<sub>c</sub> and c', H<sub>d</sub> and d', H<sub>7</sub> and H<sub>7'</sub>);

$^{13}\text{C}$  NMR ( $\text{CDCl}_3$ , 100 MHz, 298 K)  $\delta$  174.7, 174.6, 174.2, 174.0, 173.8, 173.3, 172.0, 171.9, 166.5, 166.4, 157.8, 141.8, 141.4, 140.7, 140.6, 138.1, 137.7, 137.6, 137.4, 134.7, 134.0, 133.9, 133.8, 133.1, 132.2, 131.4, 131.3, 129.2, 129.0, 128.9, 128.8, 128.7, 128.6, 128.5, 128.1, 128.0, 127.9, 127.8, 127.1, 127.0, 126.9, 126.7, 124.1, 124.0, 67.7, 67.6, 50.9, 50.7, 50.6, 50.4, 49.5, 48.8, 48.5, 48.3, 48.1, 45.1, 45.0, 44.3, 44.0, 43.9, 43.7, 39.9, 39.7, 39.6, 29.4, 29.3, 29.2, 29.1, 29.0, 28.7, 28.5, 26.8; HRMS calcd. for  $\text{C}_{85}\text{H}_{94}\text{N}_7\text{O}_9$  [ $\text{M} + \text{H}^+$ ] 1356.71130 found (FAB, m-NBA matrix) 1356.71261.

Physical data for *Cp-2*: Mp 146-148 °C;  $^1\text{H}$  NMR ( $\text{CDCl}_3$ , 400 MHz, 298 K)  $\delta$  7.35-7.18 (m, 20H,  $\text{H}_{ph}$ ), 6.34 (m, 2H,  $\text{H}_k$  and  $k'$ ), 6.16 (m, 2H,  $\text{H}_5$  and  $4'$ ), 6.06 (dd,  $J = 5.7$  Hz,  $J = 2.7$  Hz, 1H,  $\text{H}_{5'}$ ), 5.82 (bt, 1H,  $\text{H}_h$  or  $h'$ ), 5.76 (bt, 1H,  $\text{H}_h$  or  $h'$ ), 5.66 (dd,  $J = 5.7$  Hz, 2.7 Hz,  $\text{H}_4$ ), 5.49 (bt, 2H,  $\text{H}_e$  and  $e'$ ), 4.63 (d,  $J = 7.6$  Hz, 4H,  $\text{H}_b$  and  $b'$ ), 4.35 (t,  $J = 7.6$  Hz, 2H,  $\text{H}_a$ ), 4.23 (t,  $J = 8.1$  Hz, 1H,  $\text{H}_m$  or  $m'$ ), 4.19 (t,  $J = 8.1$  Hz, 1H,  $\text{H}_m$  or  $m'$ ), 4.01-3.71 (m, 4H,  $\text{H}_l$  and  $l'$ ), 3.17 (m, 8H,  $\text{H}_f$  and  $f'$  and  $\text{H}_g$  and  $g'$ ), 2.97 (s, 1H,  $\text{H}_6$ ), 2.94 (s, 1H,  $\text{H}_3$ ), 2.85 (m, 2H,  $\text{H}_3$  and  $6$ ), 2.80 (s, 1H,  $\text{H}_2$ ), 2.58 (t,  $J = 6.9$  Hz, 5H,  $\text{H}_c$  and  $c'$  and  $\text{H}_l$ ), 2.33 (t,  $J = 6.9$  Hz, 4H,  $\text{H}_d$  and  $d'$ ), 2.24 (dd,  $J = 5.5$  Hz,  $J = 1.8$  Hz, 1H,  $\text{H}_{2'}$ ), 2.21 (dd,  $J = 5.5$  Hz,  $J = 1.8$  Hz, 1H,  $\text{H}_l$ ), 1.51-1.14 (m, 44H,  $\text{H}_{alkyl}$ ,  $\text{H}_7$  and  $\text{H}_{7'}$ );  $^{13}\text{C}$  NMR ( $\text{CDCl}_3$ , 100 MHz, 298 K)  $\delta$  174.6, 174.3, 173.5, 173.2, 172.8, 157.8, 141.8, 141.6, 141.0, 138.0, 137.7, 134.4, 134.0, 128.7, 128.6, 128.5, 128.1, 128.1, 128.0, 127.9, 126.9, 126.8, 126.7, 66.8, 50.9, 50.8, 50.7, 50.5, 49.8, 48.7, 48.6, 48.4, 48.3, 45.4, 45.1, 44.3, 43.8, 43.7, 39.6, 39.5, 31.0, 29.7, 29.6, 29.5, 29.4, 29.2, 26.8; HRMS calcd for  $\text{C}_{53}\text{H}_{66}\text{N}_3\text{O}_5$  [ $\text{M} + \text{H}^+$ ] 824.50025 found (FAB, m-NBA matrix) 824.50116.
